# Supplementary material for: Dietary Milk or Isolated Legume Proteins Modulate Intestinal Microbiota Composition in Rats
Source: MDPI journal article supplement (doi:10.3390/nu16010149), 2024-01-02
Supplement: s1 [file s1]

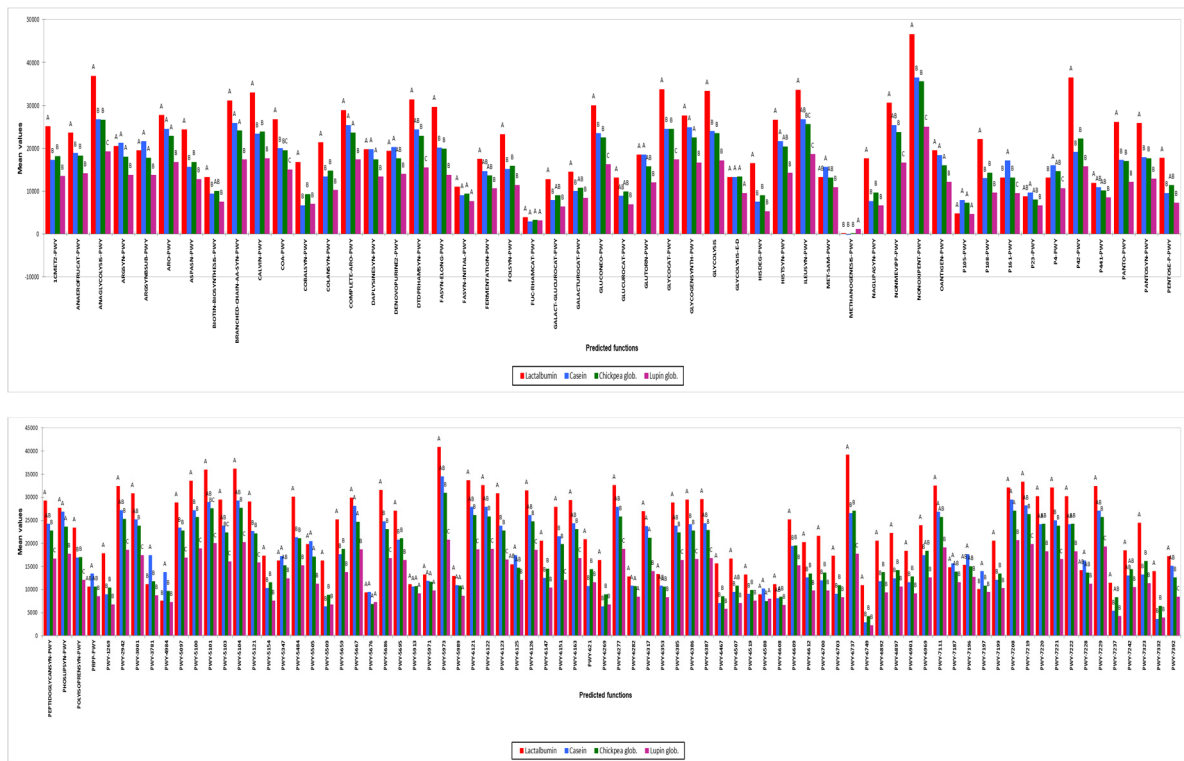

**Figure S1.** ANOVA of PICRUST functional analysis after SEMPER (50% dissimilarity) analysis, using the default parameters (LDA score = 2).

**Table S1.** SIMPER analysis at different taxonomic levels of caecal bacterial community in rats fed diets based in milk (LA, CAS) or legume proteins isolates (CPI, LI) as the only protein source. “f\_\_”, “g\_\_” and “s\_\_” indicate unknown Family, Genus and Species, respectively.

| Family                 | Average dissimilarity | Contribution % | Cumulative % |
|------------------------|-----------------------|----------------|--------------|
| Bacteroidaceae         | 4.945                 | 12.69          | 12.69        |
| Spirochaetaceae        | 4.793                 | 12.3           | 25           |
| Lachnospiraceae        | 4.466                 | 11.46          | 36.46        |
| Bacteroidales;f__S24-7 | 3.525                 | 9.047          | 45.51        |
| Ruminococcaceae        | 3.213                 | 8.247          | 53.75        |
| [Paraprevotellaceae]   | 2.518                 | 6.463          | 60.22        |
| Bifidobacteriaceae     | 1.673                 | 4.294          | 64.51        |
| Prevotellaceae         | 1.57                  | 4.03           | 68.54        |
| Clostridiales;f__      | 1.384                 | 3.553          | 72.09        |
| Helicobacteraceae      | 1.022                 | 2.623          | 74.72        |
| Bacteroidales;f__      | 1.014                 | 2.603          | 77.32        |
| Erysipelotrichaceae    | 0.9098                | 2.335          | 79.66        |
| Clostridiaceae         | 0.78                  | 2.002          | 81.66        |
| Methanobacteriaceae    | 0.6966                | 1.788          | 83.45        |
| Lactobacillaceae       | 0.6795                | 1.744          | 85.19        |

|                              |        |        |       |
|------------------------------|--------|--------|-------|
| Veillonellaceae              | 0.6602 | 1.695  | 86.88 |
| Alphaproteobacteria;f__      | 0.6456 | 1.657  | 88.54 |
| Chloroflexi;f__              | 0.6297 | 1.616  | 90.16 |
| Alcaligenaceae               | 0.5317 | 1.365  | 91.52 |
| Cyanobacteria;f__            | 0.4922 | 1.263  | 92.79 |
| Porphyromonadaceae           | 0.468  | 1.201  | 93.99 |
| Enterobacteriaceae           | 0.3877 | 0.9953 | 94.98 |
| <b>Genus</b>                 |        |        |       |
| Treponema                    | 4.893  | 13.05  | 13.05 |
| Bacteroidales;f__S24-7;g__   | 3.917  | 10.45  | 23.5  |
| Ruminococcus                 | 3.899  | 10.4   | 33.91 |
| Lachnospiraceae;g__          | 3.263  | 8.706  | 42.61 |
| Bacteroides                  | 3.012  | 8.036  | 50.65 |
| [Prevotella]                 | 2.058  | 5.492  | 56.14 |
| Bifidobacterium              | 1.598  | 4.264  | 60.41 |
| Ruminococcaceae;g__          | 1.391  | 3.712  | 64.12 |
| Roseburia                    | 1.007  | 2.686  | 66.8  |
| Helicobacter                 | 1.006  | 2.684  | 69.49 |
| Allobaculum                  | 0.9261 | 2.471  | 71.96 |
| Clostridiales;f__;g__        | 0.8719 | 2.326  | 74.28 |
| Bacteroidales;f__;g__        | 0.8552 | 2.282  | 76.57 |
| Phascolarctobacterium        | 0.6782 | 1.81   | 78.38 |
| Lactobacillus                | 0.6111 | 1.631  | 80.01 |
| Prevotella                   | 0.5774 | 1.541  | 81.55 |
| Chloroflexi;g__              | 0.5226 | 1.394  | 82.94 |
| Alphaproteobacteria;g__      | 0.5188 | 1.384  | 84.33 |
| Sutterella                   | 0.495  | 1.321  | 85.65 |
| Helicobacteraceae;g__        | 0.4872 | 1.3    | 86.95 |
| Blautia                      | 0.4147 | 1.106  | 88.05 |
| Coprococcus                  | 0.3817 | 1.018  | 89.07 |
| Oscillospira                 | 0.378  | 1.009  | 90.08 |
| Archaea;__Methanobrevibacter | 0.3698 | 0.9865 | 91.07 |
| Parabacteroides              | 0.3682 | 0.9825 | 92.05 |
| Cyanobacteria;g__            | 0.3319 | 0.8856 | 92.93 |
|                              |        |        |       |

<sup>1</sup>LA, lactalbumin. CAS, casein; CPI, chickpea protein isolate; LI, lupin protein isolate. <sup>2</sup> Values are means of 6 animals.
